# Supplementary material for: Silica nanofibrous membranes with ultra-softness and enhanced tensile strength for thermal insulation
Source: Royal Society of Chemistry journal article supplement (doi:10.1039/c4ra12271b), 2014-12-16
Supplement: c4ra12271b1.pdf [file c4ra12271b1.pdf]

Electrical Supplementary Information for

**Silica nanofibrous membranes with ultra-softness and enhanced  
tensile strength for thermal insulation**

Yinsong Si,<sup>‡a,b</sup> Xue Mao,<sup>‡b,c</sup> Hongxia Zheng,<sup>a</sup> Jianyong Yu,<sup>b</sup> and Bin Ding<sup>\*a,b</sup>

<sup>a</sup> *Key Laboratory of Textile Science & Technology, Ministry of Education, College of Textiles,  
Donghua University, Shanghai 201620, China*

<sup>b</sup> *Nanomaterials Research Center, Modern Textile Institute, Donghua University, Shanghai  
200051, China*

<sup>c</sup> *State Key Laboratory for Modification of Chemical Fibers and Polymer Materials, College of  
Materials Science and Engineering, Donghua University, Shanghai 201620, China*

*\* Corresponding author. E-mail: binding@dhu.edu.cn; Phone: +86-21-62378202; Fax: +86-  
21-62378202*

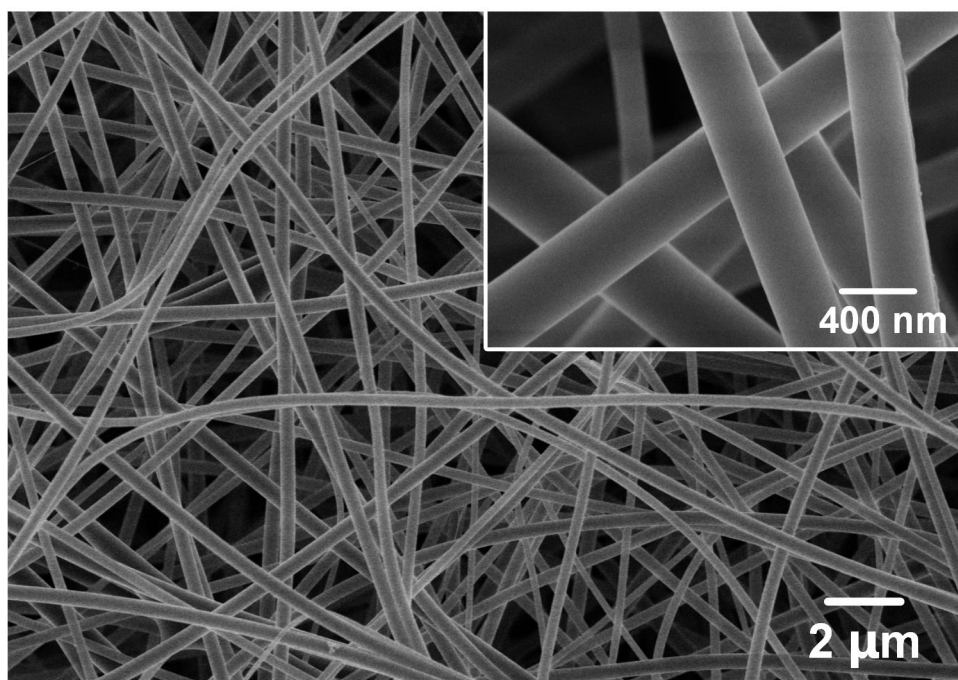

**Fig. S1** FE-SEM image of electropun precursor nanofibrous membranes.

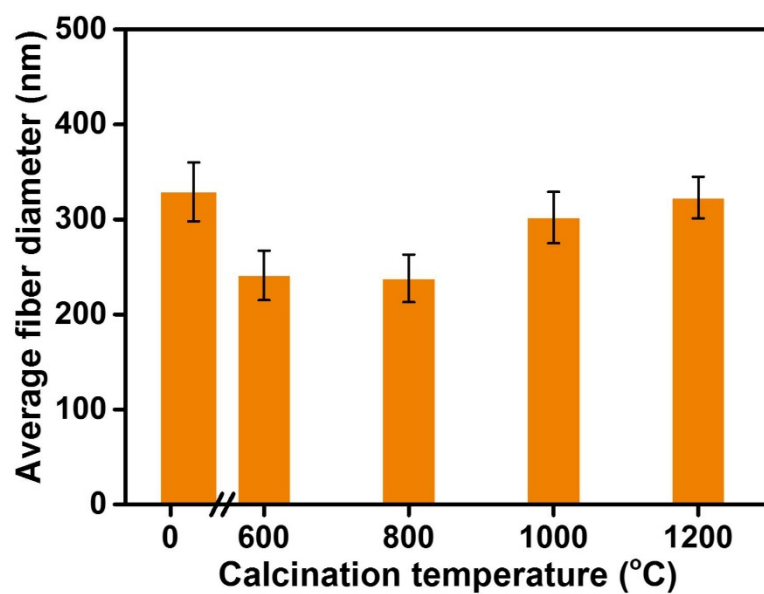

**Fig. S2** The average diameter of electropun precursor nanofibers and silica nanofibers with various calcination temperatures of 600, 800, 1000, and 1200 °C.

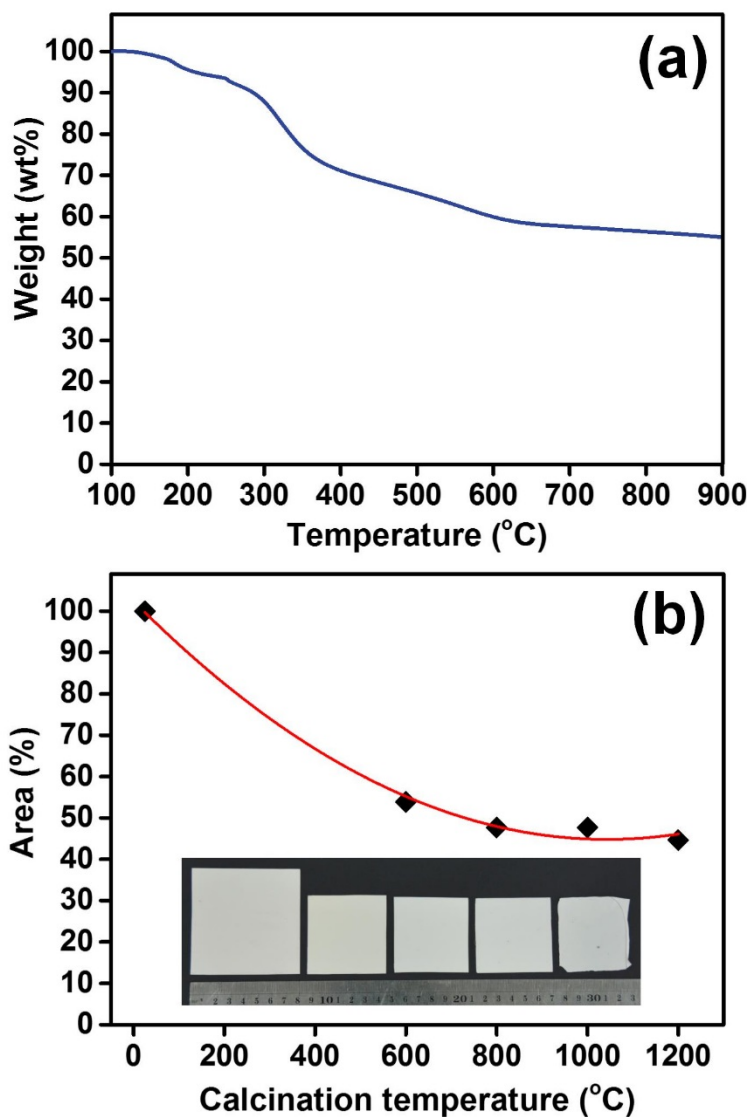

**Fig. S3** (a) Thermogravimetric analysis of precursor nanofibrous membranes. (b) The area of the membranes from precursor to SNF membranes with calcination temperatures of 600, 800, 1000, and 1200 °C, respectively. The inset is the optical images of the corresponding membranes.

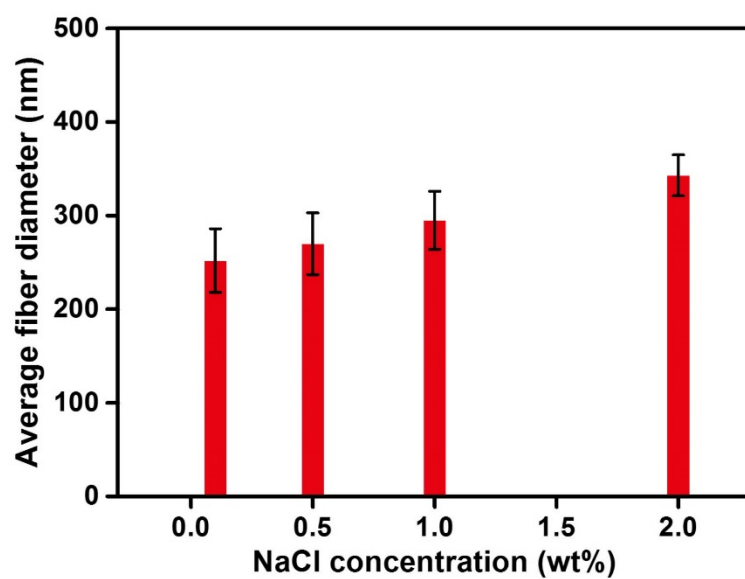

**Fig. S4** The average diameter of the precursor nanofibers with various NaCl concentrations of 0.1, 0.5, 1, and 2 wt%.

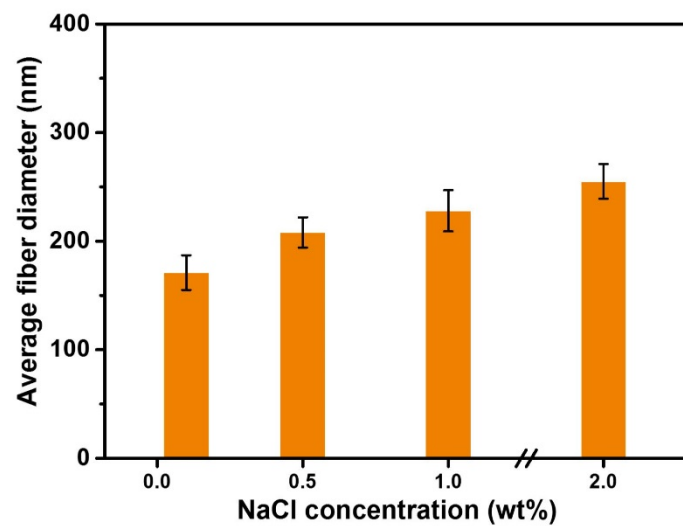

**Fig. S5** The average diameter of silica nanofibers with various NaCl concentrations of 0.1, 0.5, 1, and 2 wt%.

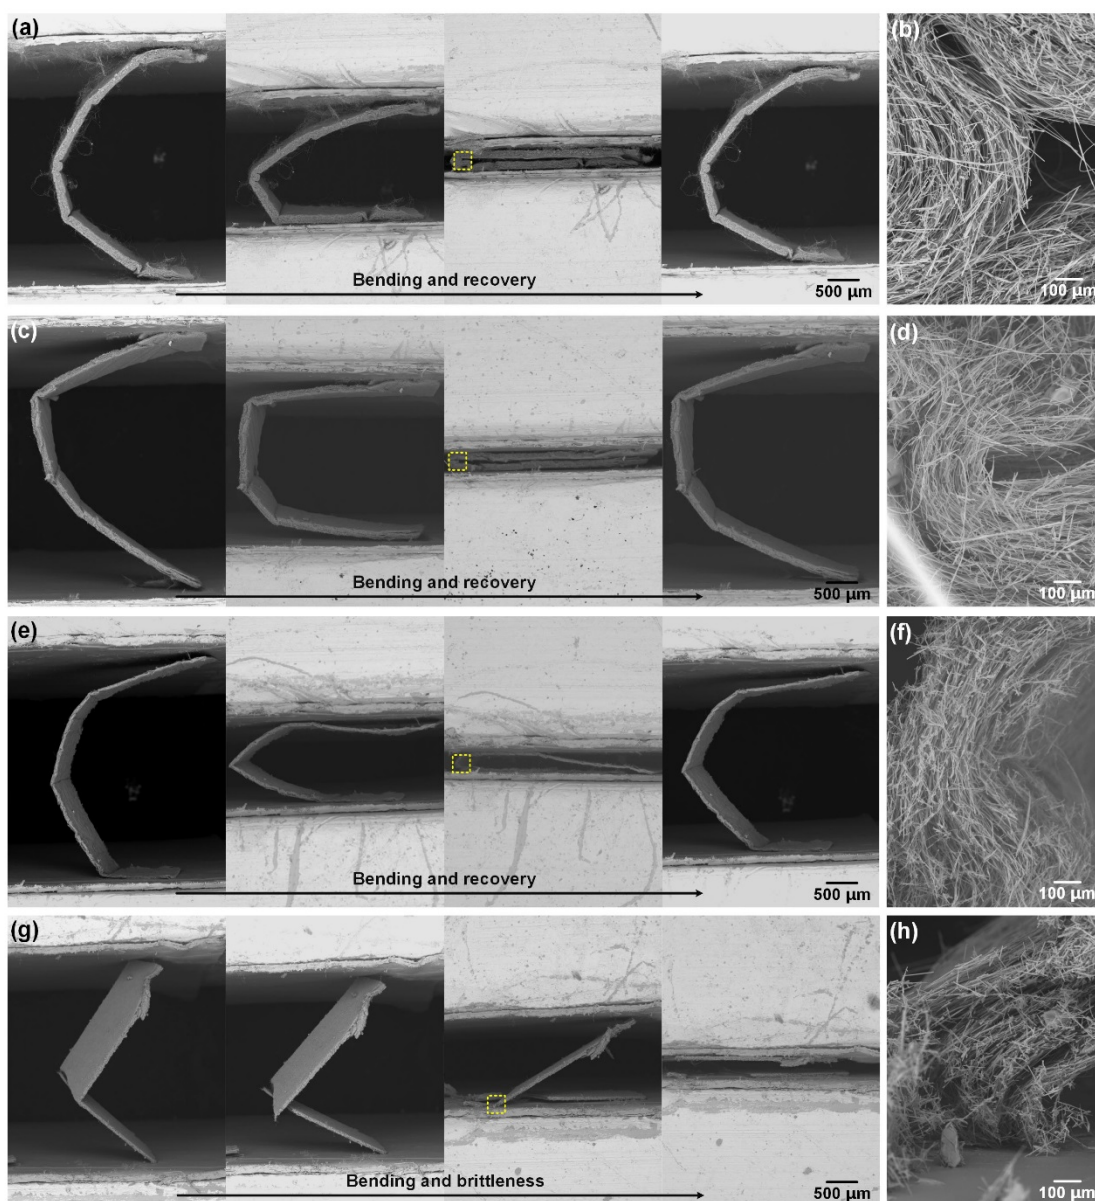

**Fig. S6** SEM images of SNF membranes with various NaCl concentrations of (a) 0, (c) 0.1, (e) 0.5, and (g) 2 wt% during the bending process. (b), (d), (f), and (h) SEM images with higher magnification of the relevant membranes in the yellow dashed box, respectively.
